# Supplementary material for: Administration of FK506 from Late Stage of Disease Prolongs Survival of Human Prion-Inoculated Mice
Source: Springer Nature journal article supplement (doi:10.1007/s13311-020-00870-1), 2020-06-01
Supplement: MOESM1 [file 25807176]

## Additional file. 1 Criteria of clinical scores

| Score | Definition                                                                                      |
|-------|-------------------------------------------------------------------------------------------------|
| 0     | $28\text{g} \leq \text{BW}$ without any symptoms                                                |
| 1     | $26\text{g} \leq \text{BW} < 28\text{g}$ , $28\text{g} \leq \text{BW}$ with one or more symptom |
| 2     | $24\text{g} \leq \text{BW} < 26\text{g}$ , $26\text{g} \leq \text{BW}$ with one or more symptom |
| 3     | $22\text{g} \leq \text{BW} < 24\text{g}$ , $24\text{g} \leq \text{BW}$ with one or more symptom |
| 4     | $20\text{g} \leq \text{BW} < 22\text{g}$                                                        |
| 5     | Less than 20g                                                                                   |
| 6     | Death                                                                                           |

**Additional file. 2 Comparison of Intensity of PrP<sup>Sc</sup> and SD50 in the each brains of mice inoculated with sCJD-3 prion**

|                | <b>Intensity</b> | <b>Log SD50 (g tissue)</b> |
|----------------|------------------|----------------------------|
| <b>Vehicle</b> | <b>0.803</b>     | <b>9.25</b>                |
|                | <b>1.348</b>     | <b>8.75</b>                |
|                | <b>0.733</b>     | <b>9.25</b>                |
|                | <b>1.117</b>     | <b>8.88</b>                |
| <b>FK506</b>   | <b>0.963</b>     | <b>9.25</b>                |
|                | <b>0.018</b>     | <b>6.63</b>                |
|                | <b>1.065</b>     | <b>9.50</b>                |
|                | <b>0.005</b>     | <b>6.25</b>                |
